# Supplementary material
Source: publisher site journal article supplement (https://www.dovepress.com/get_supplementary_file.php?f=312238.docx)
Supplement: Supplementary file 1 [file get_supplementary_file.php]

**Table S1.** The drug loading efficiency of DOX in PNPs/DOX complexes and APAS-PNPs/DOX complexes.

| Materials | DOX percentage (wt.%) | Number of complexed DOX per PEI |
| --- | --- | --- |
| PNPs/DOX | 8.75% | 12.03 |
| APAS-PNPs/DOX | 8.39% | 12.35 |

**Table S2.** The hydrodynamic sizes of PNPs/DOX complexes and APAS-PNPs/DOX complexes dispersed in PBS buffer with different pH conditions.

| pH condition | Materials | Hydrodynamic size (nm) | PDI |
| --- | --- | --- | --- |
| pH 7.4 | PNPs/DOX | 201.53 ± 12.64 | 0.32 ± 0.13 |
| APAS-PNPs/DOX | 208.21 ± 9.54 | 0.51 ± 0.08 |
| pH 6.0 | PNPs/DOX | 205.48 ± 16.84 | 0.56 ± 0.14 |
| APAS-PNPs/DOX | 241.16 ± 13.57 | 0.62 ± 0.09 |

**Abbreviation:** PDI, Poly dispersity index.

**
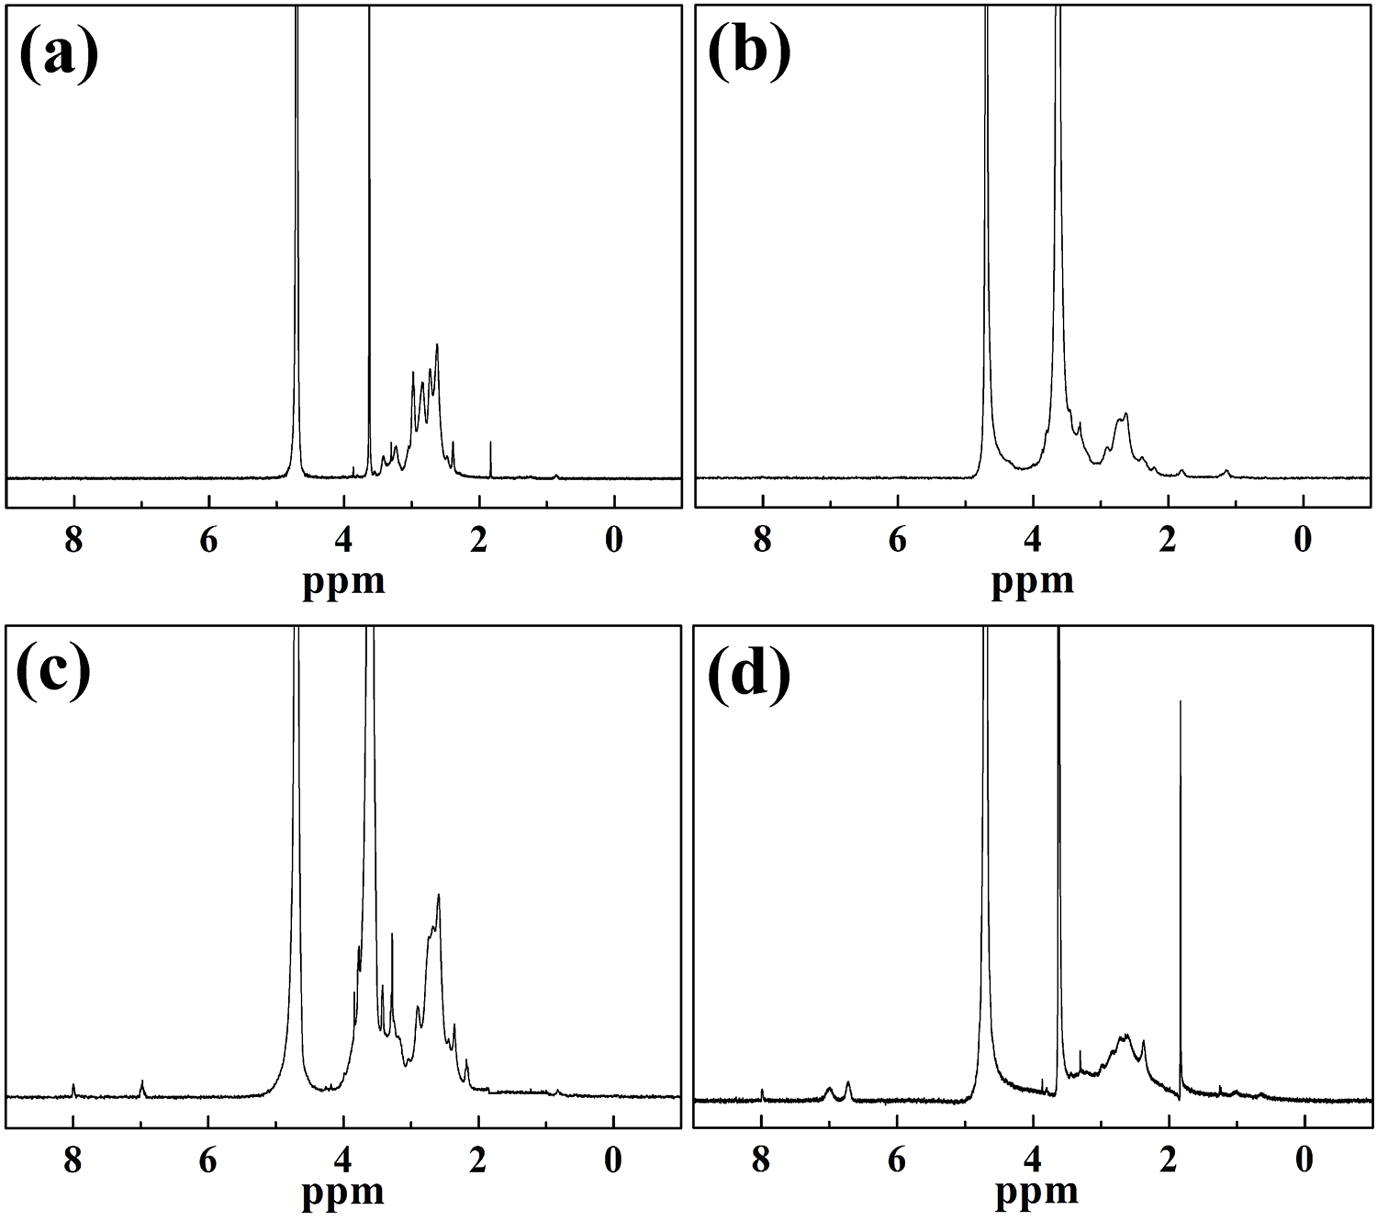
**

**Figure S1.** 1H NMR spectra of PEI.NH2-(*m*PEG) (a), PEI.NH2-(PEG-MAL)-(*m*PEG) (b), PEI.NH2-(PEG-APAS)-(*m*PEG) (c), and PEI.NH2-HPAO-(PEG-APAS)-(*m*PEG) (d). All the products were dispersed in D2O.

**Figure S2.** UV-Vis spectra of PEI.NH2-(PEG-APAS)-(*m*PEG), PEI.NH2-HPAO-(PEG-APAS)-(*m*PEG), DOX, and APAS-PNPs/DOX complexes (0.2 mg/mL) dispersed in water.


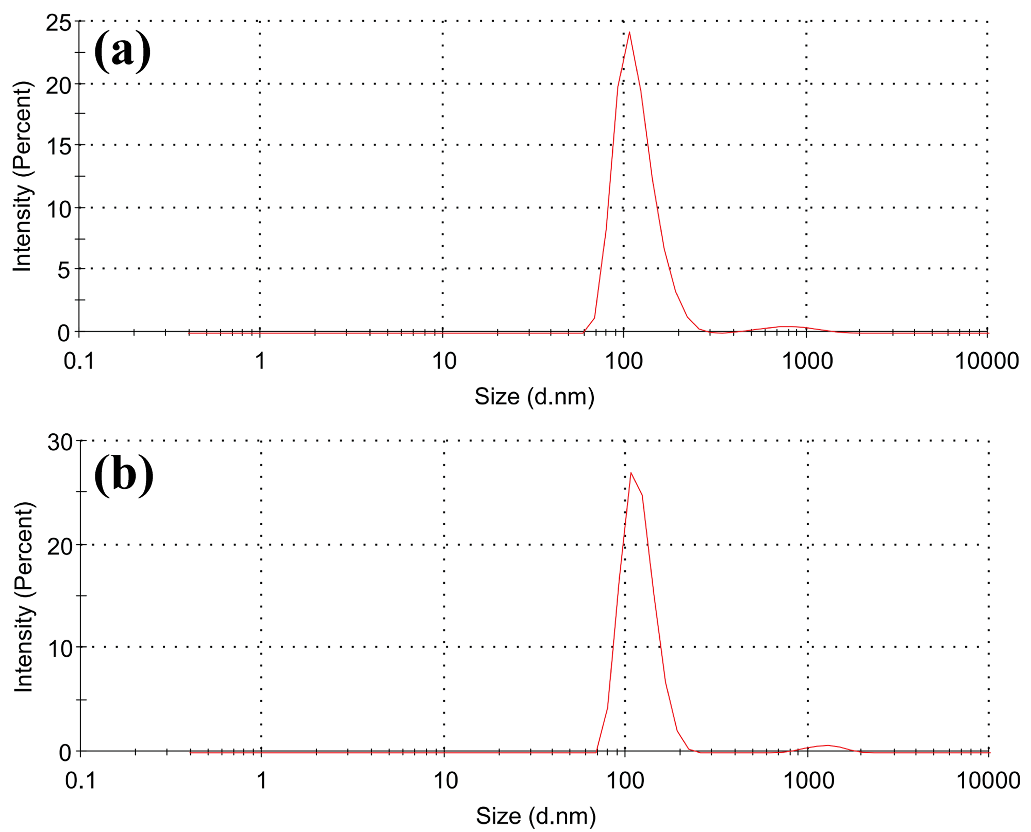


**Figure S3**. The hydrodynamic size distribution graph of PNPs/DOX complexes (a) and APAS-PNPs/DOX complexes (b) dispersed in PBS buffer with pH 7.4.

**
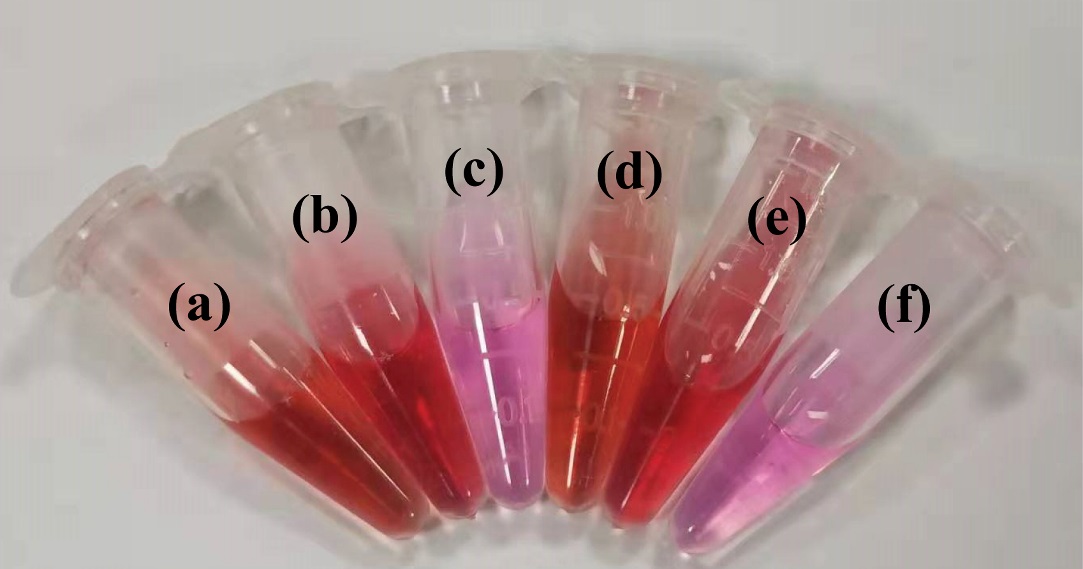
**

**Figure S4.** Photograph of the APAS-PNPs/DOX complexes (a-b) and PNPs/DOX complexes (d-e) dispersed in water (a, d), and cell culture medium (b, e) at the concentration of 0.5 mg/mL, respectively. (c, f) show the blank cell culture medium.


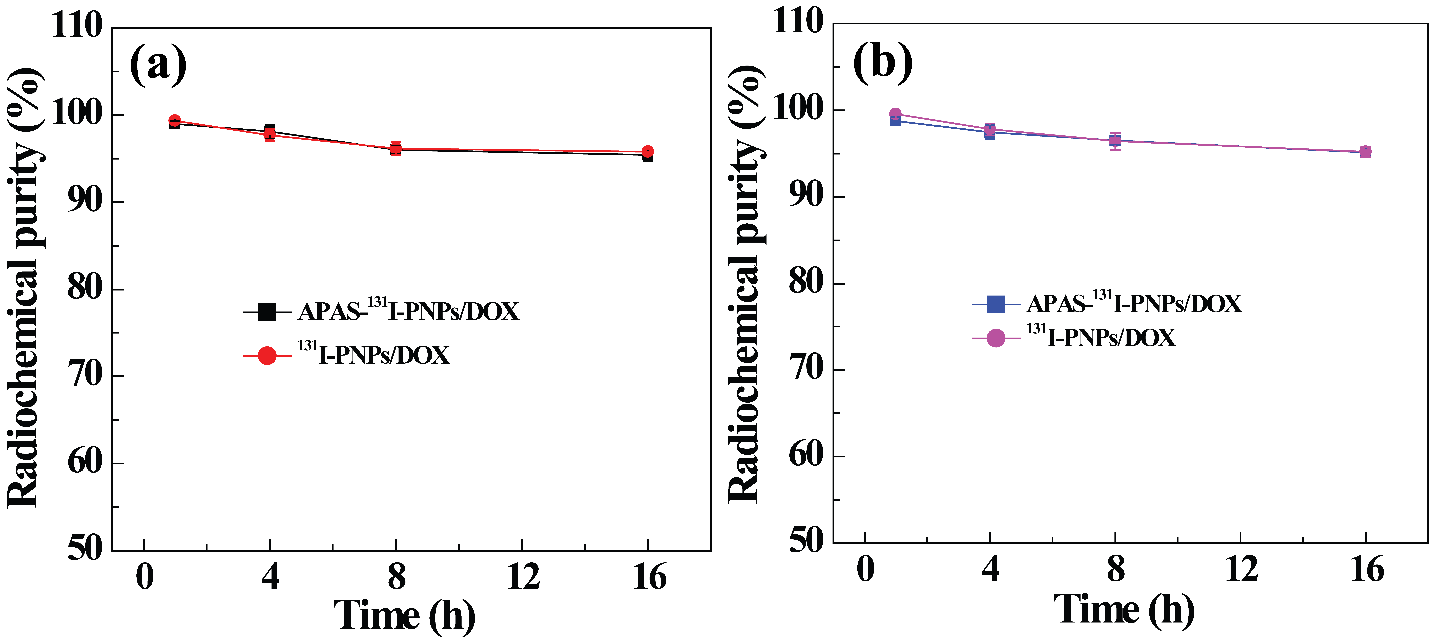


**Figure S5.** Radiochemical purities of the APAS-131I-PNPs/DOX complexes and 131I-PNPs/DOX complexes exposed to PBS at room temperature (a) and FBS at 37 °C (b) for different time periods.

**Figure S6.** Relative SPECT signal intensities of different organs at 6 h post-injection of 131I-PNPs/DOX complexes or APAS-131I-PNPs/DOX complexes. (***p < 0.001)

**Figure S7.** The absolute tumor volume of C6 tumor-bearing mice after various treatments.

**Figure S8.** The body weight of C6 tumor-bearing mice after various treatments. Saline was used as control. The relative body weights were normalized according to their initial weights (Mean ± SD, n = 5).

**Figure S9.** TUNEL-positive percentage of tumor tissue measured by TUNEL assay. (**p < 0.01, ***p < 0.001)
